# Supplementary material for: Potentially damaging variants’ analysis in autism subgroups uncovers early brain-expressed gene modules relevant to autism pathophysiology
Source: Research Square preprint supplement (doi:10.21203/rs.3.rs-5534869/v1), 2024-12-03
Supplement: Supplementary file 1 [file 456d4c63a1239c76b3d8a394.xlsx]

## Sheet: geni_moduli_sfari_interactors
Table S3. Genes in the modules and their SFARI interactors
Gene	Module_name	SFARI gene	SFARI interactors
ACTB	Gastrointestinal	1	UBE3A , CHD3 , CREBBP , HNRNPU , ARID1B
ANK3	Ion cell communication	1
CACNA1C	Ion cell communication	1
ANK2	Ion cell communication	1
MEF2C	Neurocognition	1
CDKL5	Neurocognition	1
HRAS	Immune system	1
PTEN	Immune system	1
DHCR7	Gastrointestinal	1
SMAD4	Gastrointestinal	0	YY1 , CREBBP , UBE3A
RAD21	Gastrointestinal	0	YY1
VCP	Neurocognition	0	SMARCA4 , NBEA , TRIP12 , DPYSL2 , DYNC1H1
PML	Gastrointestinal	0	SMARCA4
AXL	Immune system	0	PTPN11
TP53	Immune system , Gastrointestinal	0	EHMT1
TBP	Neurocognition	0	DYRK1A
PHF6	Immune system	0	CUL3 , HNRNPU
EWSR1	Gastrointestinal	0	CUL3 , CHD3 , HNRNPU , CREBBP , CIC , NIPBL , SMARCA4
TRIM2	Gastrointestinal	0	CUL3
MID1	Gastrointestinal	0	CUL3
MDM2	Gastrointestinal	0	CREBBP , UBE3A , EHMT1 , HNRNPU , ACTB , SMARCA4
MAPT	Neurocognition	0	CREBBP , DPYSL2 , TRIO
RAD50	Immune system	0	CREBBP , ACTB , DYNC1H1
FUS	Gastrointestinal	0	CHD3 , HNRNPU
BARD1	Immune system	0	CHD3
ACTG1	Gastrointestinal	0	ACTB , CHD3 , ASXL3 , SMARCA4 , ARID1B , HNRNPU
CASQ2	Ion cell communication	0
GJA5	Ion cell communication	0
ATP1A2	Ion cell communication	0
ATP1B1	Ion cell communication	0
GJC2	Ion cell communication	0
RYR2	Ion cell communication	0
SLC8A1	Ion cell communication	0
PDE4D	Ion cell communication , Immune system	0
TRDN	Ion cell communication	0
SRI	Ion cell communication	0
GJC3	Ion cell communication	0
CAV1	Ion cell communication	0
PKP2	Ion cell communication	0
PRKACA	Ion cell communication	0
ATP1A3	Ion cell communication	0
HRC	Ion cell communication	0
GSTM2	Ion cell communication	0
PLN	Ion cell communication	0
DMD	Ion cell communication	0
CLIC2	Ion cell communication	0
GSTO1	Ion cell communication	0
HDAC4	Ion cell communication	0
ATP2A2	Ion cell communication	0
TNNI3	Ion cell communication	0
PDE4B	Ion cell communication , Immune system	0
RGS2	Ion cell communication	0
P2RX4	Ion cell communication	0
CHGA	Ion cell communication	0
ADORA1	Ion cell communication	0
PRKG1	Ion cell communication	0
ABCC8	Ion cell communication	0
ATP2A1	Ion cell communication	0
SOD1	Ion cell communication	0
HNRNPD	Neurocognition	0
HAND2	Neurocognition	0
POU3F4	Neurocognition	0
HMGA2	Neurocognition , Gastrointestinal	0
CHMP2B	Neurocognition	0
SQSTM1	Neurocognition	0
TREM2	Neurocognition	0
C9orf72	Neurocognition	0
PSEN1	Neurocognition	0
SNURF	Neurocognition	0
SNRPN	Neurocognition	0
GRN	Neurocognition	0
CSF1R	Neurocognition	0
TYROBP	Neurocognition	0
CYP27A1	Neurocognition	0
PTPN22	Immune system	0
CD244	Immune system	0
TNFSF4	Immune system	0
IL10	Immune system	0
IL23R	Immune system	0
IL12RB2	Immune system	0
IL6R	Immune system	0
IL1B	Immune system	0
IL1R1	Immune system	0
IL1RL1	Immune system	0
IL18R1	Immune system	0
IL36RN	Immune system	0
SLC11A1	Immune system	0
INHA	Immune system	0
TLR9	Immune system	0
WNT5A	Immune system	0
CCR2	Immune system	0
CD96	Immune system	0
IL20RB	Immune system	0
IL12A	Immune system	0
IL2	Immune system	0
IL21	Immune system	0
TLR3	Immune system	0
CD14	Immune system	0
IL12B	Immune system	0
ISL1	Immune system	0
HLA-DPA1	Immune system , Gastrointestinal	0
LTA	Immune system	0
TNF	Immune system	0
HLA-DPB1	Immune system , Gastrointestinal	0
FOXP3	Immune system , Gastrointestinal	0
TLR7	Immune system	0
TLR8	Immune system	0
TLR4	Immune system	0
ABL1	Immune system	0
GATA3	Immune system	0
IL18	Immune system	0
SCGB1A1	Immune system	0
FADD	Immune system	0
CD3E	Immune system	0
NR1H4	Immune system	0
GAS6	Immune system	0
RIPK3	Immune system	0
IRF8	Immune system , Gastrointestinal	0
CCR7	Immune system	0
RARA	Immune system	0
CD226	Immune system	0
PRNP	Immune system	0
IL12RB1	Immune system	0
BCL3	Immune system	0
TNFRSF13C	Immune system	0
CTLA4	Immune system	0
HGD	Immune system	0
BTK	Immune system	0
RNASEL	Immune system	0
APC	Immune system	0
MAD1L1	Immune system	0
NBN	Immune system	0
MRE11A	Immune system	0
BRCA2	Immune system , Gastrointestinal	0
RAD51	Immune system	0
PALB2	Immune system , Gastrointestinal	0
RAD51D	Immune system	0
BRCA1	Immune system , Gastrointestinal	0
BRIP1	Immune system	0
RAD51C	Immune system	0
CHEK2	Immune system	0
WIPF1	Immune system	0
SLC35A1	Immune system	0
WAS	Immune system	0
SLC7A7	Immune system	0
HLA-DOA	Gastrointestinal	0
HLA-DRA	Gastrointestinal	0
HLA-DQA1	Gastrointestinal	0
FLVCR1	Gastrointestinal	0
IARS2	Gastrointestinal	0
GMPPA	Gastrointestinal	0
TRAPPC11	Gastrointestinal	0
HLA-DQB1	Gastrointestinal	0
SAMD9	Gastrointestinal	0
GLA	Gastrointestinal	0
AAAS	Gastrointestinal	0
NOS1	Gastrointestinal	0
CRLF1	Gastrointestinal	0
MYLK	Gastrointestinal	0
WFS1	Gastrointestinal	0
PALLD	Gastrointestinal	0
TNXB	Gastrointestinal	0
CFTR	Gastrointestinal	0
IDS	Gastrointestinal	0
FLNA	Gastrointestinal	0
RRM2B	Gastrointestinal	0
CDKN2A	Gastrointestinal	0
ACTA2	Gastrointestinal	0
C10orf2	Gastrointestinal	0
WT1	Gastrointestinal	0
EFEMP2	Gastrointestinal	0
CLMP	Gastrointestinal	0
HMBS	Gastrointestinal	0
GUCY2C	Gastrointestinal	0
DDIT3	Gastrointestinal	0
CDK4	Gastrointestinal	0
C12orf65	Gastrointestinal	0
FBLN5	Gastrointestinal	0
POLG	Gastrointestinal	0
B2M	Gastrointestinal	0
FAH	Gastrointestinal	0
MYH11	Gastrointestinal	0
PTRF	Gastrointestinal	0
SOX10	Gastrointestinal	0
TYMP	Gastrointestinal	0
PTAFR	Gastrointestinal	0
IRF6	Gastrointestinal	0
TRIM17	Gastrointestinal	0
VCAM1	Gastrointestinal	0
STAT1	Gastrointestinal	0
SP100	Gastrointestinal	0
PRKCD	Gastrointestinal	0
IRF2	Gastrointestinal	0
IRF1	Gastrointestinal	0
HLA-DRB5	Gastrointestinal	0
HLA-DRB1	Gastrointestinal	0
IFNGR1	Gastrointestinal	0
IRF4	Gastrointestinal	0
HLA-G	Gastrointestinal	0
HLA-E	Gastrointestinal	0
IRF5	Gastrointestinal	0
CAMK2G	Gastrointestinal	0
IRF7	Gastrointestinal	0
TRIM21	Gastrointestinal	0
TRIM5	Gastrointestinal	0
TRIM22	Gastrointestinal	0
CD44	Gastrointestinal	0
NCAM1	Gastrointestinal	0
IFNG	Gastrointestinal	0
PTPN6	Gastrointestinal	0
OAS1	Gastrointestinal	0
OAS2	Gastrointestinal	0
SOCS1	Gastrointestinal	0
CIITA	Gastrointestinal	0
MT2A	Gastrointestinal	0
SOCS3	Gastrointestinal	0
ICAM1	Gastrointestinal	0
IFI30	Gastrointestinal	0
IFNGR2	Gastrointestinal	0
