# Supplementary material for: Potentially damaging variants’ analysis in autism subgroups uncovers early brain-expressed gene modules relevant to autism pathophysiology
Source: Research Square preprint supplement (doi:10.21203/rs.3.rs-5534869/v1), 2024-12-03
Supplement: Supplementary file 2 [file 6c7f947922bf85aaa0b7c860.xlsx]

## Sheet: tab2
Table S2. Genes in the modules and their co-expressed interactors (extended modules). Legend: 0=no; 1=yes.
Gene	Modules	Ion cell communication module	Neurocognition module	Immune module	Gastrointestinal module	Extended ion cell communication module	Extended neurocognition module	Extended immune module	Extended gastrointestinal module	Genes cluster (GC)	bioGRID	SFARI gene
ADCY5	0	0	0	0	0	1	0	0	0	1	1	0
MDM2	1	0	0	0	1	1	1	1	1	2	1	0
SRC	0	0	0	0	0	1	1	1	0	2	1	0
ABL1	1	0	0	1	0	1	0	1	1	2	1	0
ACO2	0	0	0	0	0	1	0	0	0	3	1	0
DLD	0	0	0	0	0	1	0	0	0	3	1	0
PDHA1	0	0	0	0	0	1	0	0	0	3	1	0
SOD1	1	1	0	0	0	1	0	0	0	3	1	0
ATP5J	0	0	0	0	0	1	0	0	0	3	1	0
PIN1	0	0	0	0	0	1	0	0	0	3	1	0
NDUFAB1	0	0	0	0	0	1	0	0	0	3	1	0
HDAC4	1	1	0	0	0	1	0	0	0	2	1	0
PINK1	0	0	0	0	0	1	0	0	0	3	1	0
PRNP	1	0	0	1	0	1	0	1	1	3	1	0
RYR2	1	1	0	0	0	1	0	0	0	3	1	0
PDK3	0	0	0	0	0	1	0	0	0	3	1	0
RGS2	1	1	0	0	0	1	0	0	0	1	1	0
PDE4D	1	1	0	1	0	1	0	1	1	2	1	0
ATP1B1	1	1	0	0	0	1	0	1	0	3	1	0
ENO1	0	0	0	0	0	1	0	0	0	3	1	0
GOT1	0	0	0	0	0	1	0	0	0	3	1	0
GPX4	0	0	0	0	0	1	0	1	0	3	1	0
GSTO1	1	1	0	0	0	1	0	0	0	3	1	0
LGALS3	0	0	0	0	0	1	1	0	1	3	1	0
OAT	0	0	0	0	0	1	0	1	0	3	1	0
PCMT1	0	0	0	0	0	1	0	0	0	3	1	0
PGM1	0	0	0	0	0	1	0	0	0	3	1	0
ATP2A2	1	1	0	0	0	1	0	0	0	3	1	0
PGK1	0	0	0	0	0	1	0	0	0	3	1	0
PSAP	0	0	0	0	0	1	0	0	0	3	1	0
GCSH	0	0	0	0	0	1	0	0	0	3	1	0
SUCLG2	0	0	0	0	0	1	0	0	0	3	1	0
DECR1	0	0	0	0	0	1	0	0	0	3	1	0
GRHPR	0	0	0	0	0	1	0	0	0	3	1	0
BICD2	0	0	0	0	0	1	0	0	0	2	1	0
CACNA1D	0	0	0	0	0	1	0	0	0	3	1	0
CASQ2	1	1	0	0	0	1	0	0	0	1	0	0
GJA5	1	1	0	0	0	1	0	0	0	1	0	0
ATP1A2	1	1	0	0	0	1	0	0	0	3	1	0
GJC2	1	1	0	0	0	1	0	0	0	3	0	0
SLC8A1	1	1	0	0	0	1	0	0	0	1	0	0
TRDN	1	1	0	0	0	1	0	0	0	3	0	0
SRI	1	1	0	0	0	1	0	0	0	3	0	0
GJC3	1	1	0	0	0	1	0	0	0	NA	0	0
CAV1	1	1	0	0	0	1	0	0	0	2	0	0
ANK3	1	1	0	0	0	1	0	0	0	2	0	1
PKP2	1	1	0	0	0	1	0	0	0	2	0	0
CACNA1C	1	1	0	0	0	1	0	0	0	1	0	1
PRKACA	1	1	0	0	0	1	0	0	0	3	0	0
ATP1A3	1	1	0	0	0	1	0	0	0	1	0	0
HRC	1	1	0	0	0	1	0	0	0	3	0	0
GSTM2	1	1	0	0	0	1	0	0	0	2	0	0
ANK2	1	1	0	0	0	1	0	0	0	2	0	1
PLN	1	1	0	0	0	1	0	0	0	NA	0	0
DMD	1	1	0	0	0	1	0	0	0	2	0	0
CLIC2	1	1	0	0	0	1	0	0	0	3	0	0
TNNI3	1	1	0	0	0	1	0	0	0	1	0	0
PDE4B	1	1	0	1	0	1	0	1	0	1	0	0
P2RX4	1	1	0	0	0	1	0	0	0	1	0	0
CHGA	1	1	0	0	0	1	0	0	0	1	0	0
ADORA1	1	1	0	0	0	1	0	0	0	3	0	0
PRKG1	1	1	0	0	0	1	0	0	0	1	0	0
ABCC8	1	1	0	0	0	1	0	0	0	1	0	0
ATP2A1	1	1	0	0	0	1	0	0	0	1	0	0
TRAF6	0	0	0	0	0	0	1	1	1	2	1	0
SQSTM1	1	0	1	0	0	0	1	0	1	3	1	0
HNRNPA1	0	0	0	0	0	0	1	0	1	2	1	0
WRN	0	0	0	0	0	0	1	1	0	2	1	0
BAG6	0	0	0	0	0	0	1	0	1	2	1	0
HNRNPD	1	0	1	0	0	0	1	0	0	2	1	0
VCP	1	0	1	0	0	0	1	1	1	2	1	0
HMGA2	1	0	1	0	1	0	1	0	1	2	1	0
PICALM	0	0	0	0	0	0	1	0	0	2	1	0
TDP1	0	0	0	0	0	0	1	0	0	2	1	0
EWSR1	1	0	0	0	1	0	1	1	1	2	1	0
TBP	1	0	1	0	0	0	1	0	0	2	1	0
ERCC8	0	0	0	0	0	0	1	0	1	2	1	0
PRPF8	0	0	0	0	0	0	1	0	1	2	1	0
EZH2	0	0	0	0	0	0	1	1	1	2	1	0
MAPT	1	0	1	0	0	0	1	0	1	2	1	0
CASP3	0	0	0	0	0	0	1	1	1	2	1	0
VRK1	0	0	0	0	0	0	1	1	1	2	1	0
POR	0	0	0	0	0	0	1	0	1	2	1	0
CREBBP	0	0	0	0	0	0	1	1	1	2	1	1
PTPRU	0	0	0	0	0	0	1	0	0	2	1	0
MATR3	0	0	0	0	0	0	1	1	1	2	1	0
GSK3B	0	0	0	0	0	0	1	0	1	2	1	0
USP7	0	0	0	0	0	0	1	1	1	2	1	0
ST7	0	0	0	0	0	0	1	0	1	2	1	0
HNRNPH1	0	0	0	0	0	0	1	0	0	2	1	0
VANGL2	0	0	0	0	0	0	1	0	0	2	1	0
PTDSS1	0	0	0	0	0	0	1	0	0	2	1	0
TNPO2	0	0	0	0	0	0	1	0	0	2	1	0
POLA1	0	0	0	0	0	0	1	0	1	2	1	0
SMARCA4	0	0	0	0	0	0	1	0	1	2	1	1
BMI1	0	0	0	0	0	0	1	0	1	2	1	0
MEN1	0	0	0	0	0	0	1	0	1	2	1	0
FUBP1	0	0	0	0	0	0	1	0	0	2	1	0
MRPL38	0	0	0	0	0	0	1	0	0	3	1	0
SLC30A5	0	0	0	0	0	0	1	0	0	2	1	0
ACACA	0	0	0	0	0	0	1	0	1	2	1	0
BAX	0	0	0	0	0	0	1	0	0	2	1	0
ATXN10	0	0	0	0	0	0	1	0	0	2	1	0
CUL7	0	0	0	0	0	0	1	1	1	2	1	0
ALDH18A1	0	0	0	0	0	0	1	0	0	2	1	0
ARIH1	0	0	0	0	0	0	1	0	0	2	1	0
HNRNPH3	0	0	0	0	0	0	1	1	1	2	1	0
IQCB1	0	0	0	0	0	0	1	0	1	2	1	0
LMNB2	0	0	0	0	0	0	1	0	0	2	1	0
NBEA	0	0	0	0	0	0	1	0	0	2	1	1
PIK3R2	0	0	0	0	0	0	1	1	0	2	1	0
TRIP12	0	0	0	0	0	0	1	0	0	2	1	1
RAF1	0	0	0	0	0	0	1	1	1	2	1	0
STMN1	0	0	0	0	0	0	1	0	0	2	1	0
TCP1	0	0	0	0	0	0	1	0	1	2	1	0
TP53BP1	0	0	0	0	0	0	1	1	1	2	1	0
SYNCRIP	0	0	0	0	0	0	1	1	1	2	1	0
EEF2	0	0	0	0	0	0	1	0	0	2	1	0
TSEN34	0	0	0	0	0	0	1	0	0	2	1	0
RPS12	0	0	0	0	0	0	1	0	0	2	1	0
NIPSNAP1	0	0	0	0	0	0	1	0	1	2	1	0
RPS4X	0	0	0	0	0	0	1	1	0	2	1	0
SPTAN1	0	0	0	0	0	0	1	0	0	2	1	0
ABCC1	0	0	0	0	0	0	1	0	1	2	1	0
ISYNA1	0	0	0	0	0	0	1	0	0	2	1	0
DKC1	0	0	0	0	0	0	1	0	0	2	1	0
DYRK1A	0	0	0	0	0	0	1	0	0	2	1	1
RBM8A	0	0	0	0	0	0	1	0	0	2	1	0
UHRF1BP1	0	0	0	0	0	0	1	0	0	2	1	0
BARD1	1	0	0	1	0	0	1	1	1	2	1	0
BCS1L	0	0	0	0	0	0	1	0	0	2	1	0
NUP214	0	0	0	0	0	0	1	0	1	2	1	0
BRCC3	0	0	0	0	0	0	1	1	0	2	1	0
EIF2S2	0	0	0	0	0	0	1	0	0	2	1	0
FUS	1	0	0	0	1	0	1	0	1	2	1	0
EIF2S3	0	0	0	0	0	0	1	0	0	2	1	0
ACTG1	1	0	0	0	1	0	1	0	1	2	1	0
CD59	0	0	0	0	0	0	1	0	0	3	1	0
SLC25A4	0	0	0	0	0	0	1	0	0	3	1	0
C9orf72	1	0	1	0	0	0	1	0	0	2	1	0
SUPT16H	0	0	0	0	0	0	1	0	1	2	1	0
SAR1B	0	0	0	0	0	0	1	0	0	3	1	0
VAPB	0	0	0	0	0	0	1	0	0	3	1	0
DCXR	0	0	0	0	0	0	1	0	0	3	1	0
RARS	0	0	0	0	0	0	1	0	1	2	1	0
GARS	0	0	0	0	0	0	1	0	0	2	1	0
DDX5	0	0	0	0	0	0	1	0	1	2	1	0
DPYSL2	0	0	0	0	0	0	1	0	0	2	1	1
DYNC1H1	0	0	0	0	0	0	1	0	0	2	1	1
GSPT1	0	0	0	0	0	0	1	0	0	2	1	0
HNRNPA2B1	0	0	0	0	0	0	1	1	1	2	1	0
PFAS	0	0	0	0	0	0	1	0	1	2	1	0
RUVBL1	0	0	0	0	0	0	1	0	1	2	1	0
UBA1	0	0	0	0	0	0	1	0	0	2	1	0
STAT1	1	0	0	0	1	0	1	1	1	3	1	0
STAG1	0	0	0	0	0	0	1	0	0	2	1	0
GFPT1	0	0	0	0	0	0	1	0	0	2	1	0
RP9	0	0	0	0	0	0	1	0	0	2	1	0
DCX	0	0	0	0	0	0	1	0	0	2	1	0
EEF1B2	0	0	0	0	0	0	1	0	0	2	1	0
REEP1	0	0	0	0	0	0	1	0	0	2	1	0
TRIM2	1	0	0	0	1	0	1	0	1	2	1	0
TRIO	0	0	0	0	0	0	1	0	0	2	1	1
EXOC4	0	0	0	0	0	0	1	0	0	2	1	0
PGD	0	0	0	0	0	0	1	0	1	2	1	0
PIK3CA	0	0	0	0	0	0	1	0	0	2	1	0
CCDC50	0	0	0	0	0	0	1	0	1	2	1	0
TFAM	0	0	0	0	0	0	1	0	1	2	1	0
HAND2	1	0	1	0	0	0	1	0	0	1	0	0
MEF2C	1	0	1	0	0	0	1	0	0	2	0	1
POU3F4	1	0	1	0	0	0	1	0	0	2	0	0
CHMP2B	1	0	1	0	0	0	1	0	0	1	0	0
TREM2	1	0	1	0	0	0	1	0	0	1	0	0
PSEN1	1	0	1	0	0	0	1	0	0	2	0	0
SNURF	1	0	1	0	0	0	1	0	0	3	0	0
SNRPN	1	0	1	0	0	0	1	0	0	3	0	0
GRN	1	0	1	0	0	0	1	0	0	1	0	0
CSF1R	1	0	1	0	0	0	1	0	0	1	0	0
TYROBP	1	0	1	0	0	0	1	0	0	3	0	0
CYP27A1	1	0	1	0	0	0	1	0	0	3	0	0
CDKL5	1	0	1	0	0	0	1	0	0	1	0	1
MSH2	0	0	0	0	0	0	0	1	0	2	1	0
MRE11A	1	0	0	1	0	0	0	1	0	2	1	0
RAD50	1	0	0	1	0	0	0	1	1	2	1	0
RPL11	0	0	0	0	0	0	0	1	1	2	1	0
RARA	1	0	0	1	0	0	0	1	0	2	1	0
MED17	0	0	0	0	0	0	0	1	0	2	1	0
SOS1	0	0	0	0	0	0	0	1	0	2	1	0
CBL	0	0	0	0	0	0	0	1	1	2	1	0
RAD51	1	0	0	1	0	0	0	1	1	2	1	0
CASP1	0	0	0	0	0	0	0	1	0	3	1	0
EPHB2	0	0	0	0	0	0	0	1	0	2	1	0
MLH1	0	0	0	0	0	0	0	1	1	2	1	0
CHEK2	1	0	0	1	0	0	0	1	1	2	1	0
PALB2	1	0	0	1	1	0	0	1	1	2	1	0
FAM175A	0	0	0	0	0	0	0	1	0	2	1	0
CHEK1	0	0	0	0	0	0	0	1	1	2	1	0
NEK1	0	0	0	0	0	0	0	1	0	2	1	0
PARP1	0	0	0	0	0	0	0	1	1	2	1	0
PASK	0	0	0	0	0	0	0	1	0	2	1	0
TP53	1	0	0	1	1	0	0	1	1	2	1	0
PHF6	1	0	0	1	0	0	0	1	0	2	1	0
TEAD1	0	0	0	0	0	0	0	1	0	2	1	0
BRCA2	1	0	0	1	1	0	0	1	1	2	1	0
MED23	0	0	0	0	0	0	0	1	1	2	1	0
ERCC5	0	0	0	0	0	0	0	1	0	2	1	0
TDGF1	0	0	0	0	0	0	0	1	0	3	1	0
SLC35A1	1	0	0	1	0	0	0	1	0	2	1	0
FANCI	0	0	0	0	0	0	0	1	1	2	1	0
RNF168	0	0	0	0	0	0	0	1	1	2	1	0
BRCA1	1	0	0	1	1	0	0	1	1	2	1	0
MYC	0	0	0	0	0	0	0	1	1	2	1	0
EXO1	0	0	0	0	0	0	0	1	1	2	1	0
PSMC3IP	0	0	0	0	0	0	0	1	0	2	1	0
RNASEH2A	0	0	0	0	0	0	0	1	1	2	1	0
CUL4B	0	0	0	0	0	0	0	1	1	2	1	0
NLRP2	0	0	0	0	0	0	0	1	0	2	1	0
DDB2	0	0	0	0	0	0	0	1	0	2	1	0
IL18	1	0	0	1	0	0	0	1	0	3	1	0
HLA-DPA1	1	0	0	1	1	0	0	1	1	3	1	0
TGFBR2	0	0	0	0	0	0	0	1	0	3	1	0
MGEA5	0	0	0	0	0	0	0	1	0	2	1	0
PTPN1	0	0	0	0	0	0	0	1	1	2	1	0
ACTB	1	0	0	0	1	0	0	1	1	2	1	1
AXL	1	0	0	1	0	0	0	1	0	3	1	0
SMC1A	0	0	0	0	0	0	0	1	0	2	1	0
RFWD2	0	0	0	0	0	0	0	1	0	2	1	0
MSH3	0	0	0	0	0	0	0	1	0	2	1	0
MSH6	0	0	0	0	0	0	0	1	0	2	1	0
NRIP1	0	0	0	0	0	0	0	1	0	2	1	0
PRKDC	0	0	0	0	0	0	0	1	0	2	1	0
SPTA1	0	0	0	0	0	0	0	1	0	2	1	0
RBBP8	0	0	0	0	0	0	0	1	0	2	1	0
UBE2I	0	0	0	0	0	0	0	1	1	2	1	0
UIMC1	0	0	0	0	0	0	0	1	1	2	1	0
BRIP1	1	0	0	1	0	0	0	1	1	2	1	0
NCOA3	0	0	0	0	0	0	0	1	1	2	1	0
NPM1	0	0	0	0	0	0	0	1	1	2	1	0
STK4	0	0	0	0	0	0	0	1	0	2	1	0
TOPBP1	0	0	0	0	0	0	0	1	1	2	1	0
CHD3	0	0	0	0	0	0	0	1	1	2	1	1
SETDB1	0	0	0	0	0	0	0	1	1	2	1	0
AURKA	0	0	0	0	0	0	0	1	1	2	1	0
CBLB	0	0	0	0	0	0	0	1	0	2	1	0
DCC	0	0	0	0	0	0	0	1	0	2	1	0
DDX39B	0	0	0	0	0	0	0	1	0	2	1	0
TRAPPC11	1	0	0	0	1	0	0	1	1	2	1	0
TBC1D1	0	0	0	0	0	0	0	1	0	2	1	0
GEMIN4	0	0	0	0	0	0	0	1	1	2	1	0
SART1	0	0	0	0	0	0	0	1	1	2	1	0
HNRNPU	0	0	0	0	0	0	0	1	1	2	1	1
RAPGEF1	0	0	0	0	0	0	0	1	0	2	1	0
SMC3	0	0	0	0	0	0	0	1	1	2	1	0
LARS	0	0	0	0	0	0	0	1	1	2	1	0
BCL2	0	0	0	0	0	0	0	1	0	2	1	0
EMD	0	0	0	0	0	0	0	1	1	2	1	0
SEC23B	0	0	0	0	0	0	0	1	1	2	1	0
COL11A1	0	0	0	0	0	0	0	1	1	2	1	0
USP15	0	0	0	0	0	0	0	1	1	2	1	0
AXIN2	0	0	0	0	0	0	0	1	0	2	1	0
SNTA1	0	0	0	0	0	0	0	1	0	3	1	0
MAPK1	0	0	0	0	0	0	0	1	0	3	1	0
SLC1A3	0	0	0	0	0	0	0	1	0	3	1	0
SUOX	0	0	0	0	0	0	0	1	0	3	1	0
CAST	0	0	0	0	0	0	0	1	0	3	1	0
DLG1	0	0	0	0	0	0	0	1	0	3	1	0
NQO2	0	0	0	0	0	0	0	1	0	3	1	0
ASPA	0	0	0	0	0	0	0	1	0	3	1	0
SH3PXD2B	0	0	0	0	0	0	0	1	1	2	1	0
APAF1	0	0	0	0	0	0	0	1	1	2	1	0
ATXN7	0	0	0	0	0	0	0	1	1	2	1	0
HLA-DQB1	1	0	0	0	1	0	0	1	1	3	1	0
PTPN11	0	0	0	0	0	0	0	1	0	3	1	1
MERTK	0	0	0	0	0	0	0	1	0	3	1	0
SLC9A3R1	0	0	0	0	0	0	0	1	0	3	1	0
MMACHC	0	0	0	0	0	0	0	1	0	3	1	0
STIM1	0	0	0	0	0	0	0	1	0	3	1	0
NPTN	0	0	0	0	0	0	0	1	0	3	1	0
OMG	0	0	0	0	0	0	0	1	0	3	1	0
ACADVL	0	0	0	0	0	0	0	1	0	3	1	0
PRKAR1A	0	0	0	0	0	0	0	1	0	3	1	0
ABHD12	0	0	0	0	0	0	0	1	0	3	1	0
AARS	0	0	0	0	0	0	0	1	0	3	1	0
TNC	0	0	0	0	0	0	0	1	1	2	1	0
PTPN22	1	0	0	1	0	0	0	1	0	3	0	0
CD244	1	0	0	1	0	0	0	1	0	3	0	0
TNFSF4	1	0	0	1	0	0	0	1	0	3	0	0
IL10	1	0	0	1	0	0	0	1	0	1	0	0
IL23R	1	0	0	1	0	0	0	1	0	1	0	0
IL12RB2	1	0	0	1	0	0	0	1	0	1	0	0
IL6R	1	0	0	1	0	0	0	1	0	3	0	0
IL1B	1	0	0	1	0	0	0	1	0	1	0	0
IL1R1	1	0	0	1	0	0	0	1	0	3	0	0
IL1RL1	1	0	0	1	0	0	0	1	0	3	0	0
IL18R1	1	0	0	1	0	0	0	1	0	3	0	0
IL36RN	1	0	0	1	0	0	0	1	0	1	0	0
SLC11A1	1	0	0	1	0	0	0	1	0	2	0	0
INHA	1	0	0	1	0	0	0	1	0	1	0	0
TLR9	1	0	0	1	0	0	0	1	0	1	0	0
WNT5A	1	0	0	1	0	0	0	1	0	2	0	0
CCR2	1	0	0	1	0	0	0	1	0	1	0	0
CD96	1	0	0	1	0	0	0	1	0	3	0	0
IL20RB	1	0	0	1	0	0	0	1	0	2	0	0
IL12A	1	0	0	1	0	0	0	1	0	1	0	0
IL2	1	0	0	1	0	0	0	1	0	1	0	0
IL21	1	0	0	1	0	0	0	1	0	1	0	0
TLR3	1	0	0	1	0	0	0	1	0	3	0	0
CD14	1	0	0	1	0	0	0	1	0	2	0	0
IL12B	1	0	0	1	0	0	0	1	0	1	0	0
ISL1	1	0	0	1	0	0	0	1	0	2	0	0
LTA	1	0	0	1	0	0	0	1	0	1	0	0
TNF	1	0	0	1	0	0	0	1	0	1	0	0
HLA-DPB1	1	0	0	1	1	0	0	1	1	3	1	0
FOXP3	1	0	0	1	1	0	0	1	1	NA	0	0
TLR7	1	0	0	1	0	0	0	1	0	NA	0	0
TLR8	1	0	0	1	0	0	0	1	0	1	0	0
TLR4	1	0	0	1	0	0	0	1	0	3	0	0
GATA3	1	0	0	1	0	0	0	1	0	1	0	0
HRAS	1	0	0	1	0	0	0	1	0	1	0	1
SCGB1A1	1	0	0	1	0	0	0	1	0	1	0	0
FADD	1	0	0	1	0	0	0	1	0	NA	0	0
CD3E	1	0	0	1	0	0	0	1	0	3	0	0
NR1H4	1	0	0	1	0	0	0	1	0	2	0	0
GAS6	1	0	0	1	0	0	0	1	0	NA	0	0
RIPK3	1	0	0	1	0	0	0	1	0	3	0	0
IRF8	1	0	0	1	1	0	0	1	1	1	0	0
CCR7	1	0	0	1	0	0	0	1	0	3	0	0
CD226	1	0	0	1	0	0	0	1	0	1	0	0
IL12RB1	1	0	0	1	0	0	0	1	0	3	0	0
BCL3	1	0	0	1	0	0	0	1	0	3	0	0
TNFRSF13C	1	0	0	1	0	0	0	1	0	1	0	0
CTLA4	1	0	0	1	0	0	0	1	0	1	0	0
HGD	1	0	0	1	0	0	0	1	0	3	0	0
BTK	1	0	0	1	0	0	0	1	0	1	0	0
RNASEL	1	0	0	1	0	0	0	1	0	3	0	0
APC	1	0	0	1	0	0	0	1	0	1	0	0
MAD1L1	1	0	0	1	0	0	0	1	0	2	0	0
NBN	1	0	0	1	0	0	0	1	0	2	0	0
PTEN	1	0	0	1	0	0	0	1	0	2	0	1
RAD51D	1	0	0	1	0	0	0	1	0	2	0	0
RAD51C	1	0	0	1	0	0	0	1	0	1	0	0
WIPF1	1	0	0	1	0	0	0	1	0	3	0	0
WAS	1	0	0	1	0	0	0	1	0	NA	0	0
SLC7A7	1	0	0	1	0	0	0	1	0	2	0	0
SMAD4	1	0	0	0	1	0	0	0	1	2	1	0
SMAD1	0	0	0	0	0	0	0	0	1	2	1	0
TRIM24	0	0	0	0	0	0	0	0	1	2	1	0
SNIP1	0	0	0	0	0	0	0	0	1	2	1	0
SF1	0	0	0	0	0	0	0	0	1	2	1	0
TGFBRAP1	0	0	0	0	0	0	0	0	1	2	1	0
TGFBR1	0	0	0	0	0	0	0	0	1	2	1	0
MX1	0	0	0	0	0	0	0	0	1	3	1	0
PPM1D	0	0	0	0	0	0	0	0	1	2	1	0
RUVBL2	0	0	0	0	0	0	0	0	1	2	1	0
DHX9	0	0	0	0	0	0	0	0	1	2	1	0
RAD21	1	0	0	0	1	0	0	0	1	2	1	0
TAP1	0	0	0	0	0	0	0	0	1	3	1	0
CUL3	0	0	0	0	0	0	0	0	1	2	1	1
CUL5	0	0	0	0	0	0	0	0	1	2	1	0
POLH	0	0	0	0	0	0	0	0	1	2	1	0
SHBG	0	0	0	0	0	0	0	0	1	3	1	0
PML	1	0	0	0	1	0	0	0	1	2	1	0
ATN1	0	0	0	0	0	0	0	0	1	2	1	0
TRAPPC2	0	0	0	0	0	0	0	0	1	2	1	0
AKT1	0	0	0	0	0	0	0	0	1	2	1	0
PBX1	0	0	0	0	0	0	0	0	1	2	1	0
UBE3A	0	0	0	0	0	0	0	0	1	2	1	1
TAP2	0	0	0	0	0	0	0	0	1	3	1	0
DDIT3	1	0	0	0	1	0	0	0	1	3	1	0
VCAM1	1	0	0	0	1	0	0	0	1	2	1	0
SMAD9	0	0	0	0	0	0	0	0	1	2	1	0
CSNK1D	0	0	0	0	0	0	0	0	1	2	1	0
FN1	0	0	0	0	0	0	0	0	1	2	1	0
PRRC2A	0	0	0	0	0	0	0	0	1	2	1	0
EHMT2	0	0	0	0	0	0	0	0	1	2	1	0
IRF1	1	0	0	0	1	0	0	0	1	3	1	0
CCDC8	0	0	0	0	0	0	0	0	1	2	1	0
HLA-DRB1	1	0	0	0	1	0	0	0	1	3	1	0
DGUOK	0	0	0	0	0	0	0	0	1	2	1	0
GNAI3	0	0	0	0	0	0	0	0	1	2	1	0
NFIA	0	0	0	0	0	0	0	0	1	2	1	0
C10orf2	1	0	0	0	1	0	0	0	1	2	1	0
CSNK2A2	0	0	0	0	0	0	0	0	1	2	1	0
NR1H3	0	0	0	0	0	0	0	0	1	3	1	0
TET2	0	0	0	0	0	0	0	0	1	2	1	0
NEK4	0	0	0	0	0	0	0	0	1	2	1	0
SP100	1	0	0	0	1	0	0	0	1	3	1	0
C12orf65	1	0	0	0	1	0	0	0	1	2	1	0
NDN	0	0	0	0	0	0	0	0	1	2	1	0
PLCE1	0	0	0	0	0	0	0	0	1	2	1	0
NCAM1	1	0	0	0	1	0	0	0	1	2	1	0
UVSSA	0	0	0	0	0	0	0	0	1	2	1	0
EIF3H	0	0	0	0	0	0	0	0	1	2	1	0
AARS2	0	0	0	0	0	0	0	0	1	2	1	0
APEX1	0	0	0	0	0	0	0	0	1	2	1	0
RHOB	0	0	0	0	0	0	0	0	1	3	1	0
RPN2	0	0	0	0	0	0	0	0	1	2	1	0
NFE2L2	0	0	0	0	0	0	0	0	1	3	1	0
XPA	0	0	0	0	0	0	0	0	1	2	1	0
USF1	0	0	0	0	0	0	0	0	1	2	1	0
HLA-DQA1	1	0	0	0	1	0	0	0	1	3	1	0
ADCY9	0	0	0	0	0	0	0	0	1	3	1	0
DROSHA	0	0	0	0	0	0	0	0	1	2	1	0
YY1	0	0	0	0	0	0	0	0	1	2	1	1
CLPP	0	0	0	0	0	0	0	0	1	2	1	0
TFRC	0	0	0	0	0	0	0	0	1	3	1	0
TROVE2	0	0	0	0	0	0	0	0	1	2	1	0
FAH	1	0	0	0	1	0	0	0	1	3	1	0
AHCY	0	0	0	0	0	0	0	0	1	2	1	0
RNF113A	0	0	0	0	0	0	0	0	1	2	1	0
ASXL3	0	0	0	0	0	0	0	0	1	2	1	1
UNG	0	0	0	0	0	0	0	0	1	2	1	0
FASN	0	0	0	0	0	0	0	0	1	2	1	0
RPS15A	0	0	0	0	0	0	0	0	1	2	1	0
DHFR	0	0	0	0	0	0	0	0	1	2	1	0
POLR3A	0	0	0	0	0	0	0	0	1	2	1	0
EHMT1	0	0	0	0	0	0	0	0	1	2	1	1
RPS3	0	0	0	0	0	0	0	0	1	2	1	0
RASSF1	0	0	0	0	0	0	0	0	1	2	1	0
B2M	1	0	0	0	1	0	0	0	1	3	1	0
RPS14	0	0	0	0	0	0	0	0	1	2	1	0
MT2A	1	0	0	0	1	0	0	0	1	3	1	0
SYNE2	0	0	0	0	0	0	0	0	1	2	1	0
SRA1	0	0	0	0	0	0	0	0	1	3	1	0
GSTP1	0	0	0	0	0	0	0	0	1	2	1	0
DCP1B	0	0	0	0	0	0	0	0	1	2	1	0
MKRN3	0	0	0	0	0	0	0	0	1	2	1	0
SF3B4	0	0	0	0	0	0	0	0	1	2	1	0
IRF2	1	0	0	0	1	0	0	0	1	3	1	0
SF3B1	0	0	0	0	0	0	0	0	1	2	1	0
SFPQ	0	0	0	0	0	0	0	0	1	2	1	0
TTI2	0	0	0	0	0	0	0	0	1	2	1	0
TNFSF12	0	0	0	0	0	0	0	0	1	3	1	0
AAAS	1	0	0	0	1	0	0	0	1	2	1	0
FLNA	1	0	0	0	1	0	0	0	1	2	1	0
HLA-DRB5	1	0	0	0	1	0	0	0	1	3	1	0
IGF2R	0	0	0	0	0	0	0	0	1	2	1	0
CIC	0	0	0	0	0	0	0	0	1	2	1	1
RAD23B	0	0	0	0	0	0	0	0	1	2	1	0
NIPBL	0	0	0	0	0	0	0	0	1	2	1	1
GLTSCR1	0	0	0	0	0	0	0	0	1	2	1	0
SPECC1L	0	0	0	0	0	0	0	0	1	2	1	0
NFIX	0	0	0	0	0	0	0	0	1	2	1	0
TRIM22	1	0	0	0	1	0	0	0	1	3	1	0
VEGFA	0	0	0	0	0	0	0	0	1	2	1	0
VIM	0	0	0	0	0	0	0	0	1	2	1	0
HNRNPUL1	0	0	0	0	0	0	0	0	1	2	1	0
TIA1	0	0	0	0	0	0	0	0	1	2	1	0
ZCCHC8	0	0	0	0	0	0	0	0	1	2	1	0
PCM1	0	0	0	0	0	0	0	0	1	2	1	0
GCDH	0	0	0	0	0	0	0	0	1	3	1	0
BCKDHB	0	0	0	0	0	0	0	0	1	3	1	0
TBX3	0	0	0	0	0	0	0	0	1	3	1	0
ABCB7	0	0	0	0	0	0	0	0	1	2	1	0
FASTKD2	0	0	0	0	0	0	0	0	1	2	1	0
HNRNPDL	0	0	0	0	0	0	0	0	1	2	1	0
MRPL42	0	0	0	0	0	0	0	0	1	2	1	0
MRPS27	0	0	0	0	0	0	0	0	1	2	1	0
PYCR1	0	0	0	0	0	0	0	0	1	2	1	0
RBM28	0	0	0	0	0	0	0	0	1	2	1	0
EPHA3	0	0	0	0	0	0	0	0	1	2	1	0
POLG	1	0	0	0	1	0	0	0	1	2	1	0
ALMS1	0	0	0	0	0	0	0	0	1	2	1	0
IFNGR1	1	0	0	0	1	0	0	0	1	3	1	0
DIS3L2	0	0	0	0	0	0	0	0	1	2	1	0
ELP2	0	0	0	0	0	0	0	0	1	2	1	0
HK2	0	0	0	0	0	0	0	0	1	2	1	0
MRPL43	0	0	0	0	0	0	0	0	1	2	1	0
SRGAP2	0	0	0	0	0	0	0	0	1	2	1	0
TAPBP	0	0	0	0	0	0	0	0	1	3	1	0
ROCK1	0	0	0	0	0	0	0	0	1	2	1	0
NOS1	1	0	0	0	1	0	0	0	1	1	1	0
YTHDF2	0	0	0	0	0	0	0	0	1	2	1	0
ARID1B	0	0	0	0	0	0	0	0	1	2	1	1
ARID1A	0	0	0	0	0	0	0	0	1	2	1	0
CCT5	0	0	0	0	0	0	0	0	1	2	1	0
DLG5	0	0	0	0	0	0	0	0	1	2	1	0
ALDH6A1	0	0	0	0	0	0	0	0	1	3	1	0
SMARCAL1	0	0	0	0	0	0	0	0	1	2	1	0
RBM14	0	0	0	0	0	0	0	0	1	2	1	0
FDFT1	0	0	0	0	0	0	0	0	1	2	1	0
HLA-DOA	1	0	0	0	1	0	0	0	1	3	0	0
HLA-DRA	1	0	0	0	1	0	0	0	1	NA	0	0
FLVCR1	1	0	0	0	1	0	0	0	1	2	0	0
IARS2	1	0	0	0	1	0	0	0	1	1	0	0
GMPPA	1	0	0	0	1	0	0	0	1	3	0	0
SAMD9	1	0	0	0	1	0	0	0	1	3	0	0
GLA	1	0	0	0	1	0	0	0	1	2	0	0
CRLF1	1	0	0	0	1	0	0	0	1	3	0	0
MYLK	1	0	0	0	1	0	0	0	1	3	0	0
WFS1	1	0	0	0	1	0	0	0	1	3	0	0
PALLD	1	0	0	0	1	0	0	0	1	2	0	0
TNXB	1	0	0	0	1	0	0	0	1	1	0	0
CFTR	1	0	0	0	1	0	0	0	1	1	0	0
IDS	1	0	0	0	1	0	0	0	1	3	0	0
RRM2B	1	0	0	0	1	0	0	0	1	1	0	0
CDKN2A	1	0	0	0	1	0	0	0	1	1	0	0
ACTA2	1	0	0	0	1	0	0	0	1	1	0	0
WT1	1	0	0	0	1	0	0	0	1	1	0	0
EFEMP2	1	0	0	0	1	0	0	0	1	3	0	0
DHCR7	1	0	0	0	1	0	0	0	1	2	0	1
CLMP	1	0	0	0	1	0	0	0	1	2	0	0
HMBS	1	0	0	0	1	0	0	0	1	1	0	0
GUCY2C	1	0	0	0	1	0	0	0	1	3	0	0
CDK4	1	0	0	0	1	0	0	0	1	2	1	0
FBLN5	1	0	0	0	1	0	0	0	1	1	0	0
MYH11	1	0	0	0	1	0	0	0	1	3	0	0
PTRF	1	0	0	0	1	0	0	0	1	NA	0	0
SOX10	1	0	0	0	1	0	0	0	1	3	0	0
TYMP	1	0	0	0	1	0	0	0	1	NA	0	0
PTAFR	1	0	0	0	1	0	0	0	1	2	0	0
IRF6	1	0	0	0	1	0	0	0	1	1	0	0
TRIM17	1	0	0	0	1	0	0	0	1	3	0	0
PRKCD	1	0	0	0	1	0	0	0	1	3	0	0
IRF4	1	0	0	0	1	0	0	0	1	1	0	0
HLA-G	1	0	0	0	1	0	0	0	1	NA	0	0
HLA-E	1	0	0	0	1	0	0	0	1	3	0	0
IRF5	1	0	0	0	1	0	0	0	1	1	0	0
MID1	1	0	0	0	1	0	0	0	1	2	1	0
CAMK2G	1	0	0	0	1	0	0	0	1	3	0	0
IRF7	1	0	0	0	1	0	0	0	1	1	0	0
TRIM21	1	0	0	0	1	0	0	0	1	1	0	0
TRIM5	1	0	0	0	1	0	0	0	1	2	0	0
CD44	1	0	0	0	1	0	0	0	1	2	0	0
IFNG	1	0	0	0	1	0	0	0	1	1	0	0
PTPN6	1	0	0	0	1	0	0	0	1	3	0	0
OAS1	1	0	0	0	1	0	0	0	1	3	0	0
OAS2	1	0	0	0	1	0	0	0	1	3	0	0
SOCS1	1	0	0	0	1	0	0	0	1	NA	0	0
CIITA	1	0	0	0	1	0	0	0	1	3	0	0
SOCS3	1	0	0	0	1	0	0	0	1	1	0	0
ICAM1	1	0	0	0	1	0	0	0	1	3	0	0
IFI30	1	0	0	0	1	0	0	0	1	1	0	0
IFNGR2	1	0	0	0	1	0	0	0	1	2	0	0
