# Supplementary material for: Potentially damaging variants’ analysis in autism subgroups uncovers early brain-expressed gene modules relevant to autism pathophysiology
Source: Research Square preprint supplement (doi:10.21203/rs.3.rs-5534869/v1), 2024-12-03
Supplement: Supplementary file 3 [file 8c954f108607ad6bb2f874b9.xlsx]

## Sheet: geni_pannello
Table S1. Panel of genes under analysis in the present work
TNFRSF4
MRPL20
PEX10
MMEL1
NPHP4
TNFRSF25
PLEKHG5
UTS2
ENO1
SLC2A5
MASP2
MTOR
MTHFR
NPPA
NPPB
DHRS3
CASP9
HSPB7
EPHA2
SPATA21
ATP13A2
SDHB
TAS1R2
ALDH4A1
EMC1
AKR7A2
PLA2G2A
PLA2G2D
DDOST
ECE1
HSPG2
WNT4
ID3
GALE
HMGCL
FUCA1
CNR2
RUNX3
STMN1
SLC30A2
TRIM63
NR0B2
FCN3
PTAFR
SDC3
FABP3
YARS
AK2
DLGAP3
ZMYM6
RP11-244H3.4
SFPQ
COL8A2
MRPS15
CSF3R
GRIK3
SNIP1
RSPO1
MTF1
MYCL
PPT1
COL9A2
RIMS3
EDN2
CLDN19
LEPRE1
SLC2A1
PTCH2
EIF2B3
MUTYH
IPP
POMGNT1
TAL1
STIL
AGBL4
ORC1
LRP8
PARS2
DHCR24
USP24
C8B
TACSTD2
CYP2J2
SLC35D1
RPE65
NEGR1
FUBP1
BCL10
DDAH1
ZNHIT6
SEP15
ZNF644
TGFBR3
GLMN
GFI1
EVI5
GCLM
ABCA4
F3
ALG14
DPYD
DBT
COL11A1
SORT1
GNAT2
GSTM3
ALX3
OVGP1
ADORA3
SLC16A1
PTPN22
AP4B1
TRIM33
AMPD1
NRAS
CSDE1
NGF
CASQ2
CD58
SPAG17
TBX15
WARS2
HMGCS2
NOTCH2
FMO5
GJA5
SF3B4
APH1A
MCL1
ENSA
CTSK
ARNT
RFX5
POGZ
MRPL9
S100A14
GATAD2B
TPM3
ADAR
DPM3
MUC1
CLK2
PKLR
ASH1L
GON4L
RIT1
MEF2D
IQGAP3
MRPL24
ARHGEF11
FCRL3
SPTA1
CRP
PIGM
PEX19
CD244
USF1
PVRL4
APOA2
NR1I3
MPZ
RXRG
ALDH9A1
TMCO1
CD247
ADCY10
SLC19A2
F5
SELP
SELL
SELE
MYOC
TNFSF4
SERPINC1
MRPS14
TNR
RFWD2
SEC16B
NPHS2
ACBD6
GLUL
RNASEL
NCF2
PTGS2
F13B
ASPM
ZBTB41
DDX59
CACNA1S
TMEM9
TNNT2
LAD1
SYT2
ADIPOR1
CHI3L1
CHIT1
REN
DSTYK
RAB7L1
SLC41A1
SLC26A9
IL10
PIGR
LAMB3
IRF6
RD3
PTPN14
USH2A
ESRRG
SLC30A10
RAB3GAP2
TLR5
LBR
PARP1
MRPL55
C1orf145
TRIM17
HIST3H3
ACTA1
AGT
EGLN1
B3GALNT2
LYST
NID1
RGS7
FH
AKT3
HNRNPU
SMYD3
OR13G1
AGRN
B3GALT6
TAS1R3
GABRD
SKI
PRDM16
TP73
TAS1R1
CAMTA1
PER3
PARK7
CA6
H6PD
SLC25A33
PIK3CD
NMNAT1
PGD
PEX14
UBIAD1
PLOD1
MFN2
MIIP
TNFRSF1B
CTRC
RSC1A1
SLC25A34
FBLIM1
CLCNKA
CLCNKB
PAX7
HTR6
PLA2G5
CDA
PINK1
ALPL
ZBTB40
C1QA
C1QC
C1QB
EPHB2
RPL11
GRHL3
LDLRAP1
SEPN1
RP1-317E23.6
CNKSR1
CATSPER4
LIN28A
DHDDS
ARID1A
PIGV
NUDC
SESN2
YTHDF2
OPRD1
EPB41
PTPRU
HCRTR1
CCDC28B
LCK
TSSK3
ADC
GJB4
GJB3
GJA4
AGO1
TEKT2
NDUFS5
MFSD2A
RLF
ZMPSTE24
SMAP2
EXO5
ERMAP
WDR65
MPL
SZT2
PTPRF
ST3GAL3
UROD
MMACHC
RAD54L
UQCRH
FAAH
CYP4B1
CMPK1
FOXE3
CDKN2C
SCP2
CPT2
DIO1
MRPL37
BSND
PCSK9
PRKAA2
C8A
HOOK1
NFIA
ANGPTL3
FOXD3
ALG6
PGM1
DNAJC6
LEPR
PDE4B
IL23R
IL12RB2
CTH
TNNI3K
FPGT-TNNI3K
LHX8
ACADM
MSH4
NEXN
IFI44L
CLCA2
CLCA1
RPL5
ABCD3
AGL
VCAM1
S1PR1
NTNG1
GPSM2
SARS
GNAI3
GSTM2
GSTM5
CSF1
SLC6A17
RBM15
PROK1
CHI3L2
CHIA
DDX20
TSHB
VANGL1
SLC22A15
TTF2
MAN1A2
PHGDH
HFE2
RBM8A
PEX11B
CHD1L
BCL9
GJA8
VPS45
PRPF3
TARS2
ECM1
ADAMTSL4
SETDB1
PSMB4
LCE5A
LCE3C
LCE3B
SPRR3
LOR
NPR1
HAX1
IL6R
CHRNB2
EFNA4
SYT11
LAMTOR2
LMNA
SEMA4A
SLC25A44
PRCC
NTRK1
PEAR1
CD1A
CD1E
DARC
FCER1A
DUSP23
ATP1A2
NCSTN
VANGL2
PPOX
NDUFS2
ATF6
NOS1AP
RP11-565P22.6
DDR2
PBX1
MGST3
TBX19
ATP1B1
GORAB
PRRX1
FMO3
FMO6P
FMO2
FMO1
FMO4
FASLG
DARS2
LHX4
MR1
CACNA1E
NPL
DHX9
LAMC1
LAMC2
HMCN1
PRG4
PLA2G4A
RGS2
TROVE2
CDC73
CFH
CFHR5
CRB1
LHX9
PTPRC
PKP1
ADORA1
OPTC
ATP2B4
SNRPE
MDM4
CDK18
AVPR1B
SRGAP2
IL19
C4BPA
CD55
CR2
CD46
HSD11B1
SYT14
HHAT
ATF3
FLVCR1
TGFB2
IARS2
HLX
MIA3
DISP1
EPHX1
PSEN2
ADCK3
GJC2
IBA57
OBSCN
GALNT2
GNPAT
DISC1
TBCE
EDARADD
ACTN2
MTR
RYR2
CHRM3
FMN2
EXO1
SDCCAG8
ZBTB18
COX20
NLRP3
PXDN
MYT1L
ADAM17
ODC1
ROCK2
NBAS
NT5C1B
NT5C1B-RDH14
OSR1
WDR35
MATN3
HS1BP3
APOB
TP53I3
ITSN2
ADCY3
POMC
DNMT3A
HADHA
OTOF
MPV17
EIF2B4
ZNF513
IFT172
C2orf71
ALK
CAPN13
XDH
PRKD3
CYP1B1
SOS1
SLC8A1
THADA
ABCG5
LRPPRC
PREPL
SIX2
MCFD2
LHCGR
FSHR
NRXN1
PNPT1
EFEMP1
FANCL
BCL11A
FAM161A
WDPCP
BMP10
GFPT1
NFU1
ASPRV1
TIA1
FIGLA
CD207
MCEE
CYP26B1
RAB11FIP5
BOLA3
SLC4A5
RP11-287D1.3
DCTN1
MOGS
MRPL53
TACR1
SUCLG1
GGCX
SFTPB
ST3GAL5
IMMT
REEP1
CD8A
FABP1
EIF2AK3
MRPS5
ADRA2B
TMEM127
SNRNP200
SEMA4C
COA5
AFF3
CHST10
RFX8
TGFBRAP1
FHL2
EDAR
NPHP1
IL1A
IL1B
PAX8
BIN1
ERCC3
LCT
MCM6
DARS
CXCR4
ZEB2
ORC4
MMADHC
NEB
CACNB4
NR4A2
AC011308.1
ACVR1C
ACVR1
IFIH1
GRB14
SCN3A
GALNT3
TTC21B
SCN1A
SCN9A
STK39
ABCB11
LRP2
TLK1
SLC25A12
DLX2
WIPF1
CHRNA1
CHN1
ATP5G3
NFE2L2
PDE11A
PRKRA
TTN
ZNF385B
CERKL
NEUROD1
FRZB
NCKAP1
TFPI
COL5A2
SLC40A1
MSTN
HIBCH
STAT1
SF3B1
SATB2
TRAK2
TMEM237
MPP4
ALS2
NDUFS1
GPR1
CRYGD
CRYGC
CRYGB
IDH1
ACADL
ERBB4
BARD1
ABCA12
FN1
PECR
IGFBP5
TNP1
CXCR1
PRKAG3
FEV
IHH
NHEJ1
ABCB6
OBSL1
PAX3
SCG2
CUL3
IRS1
COL4A4
SLC19A3
TRIP12
SP110
GPR55
HTR2B
NPPC
ECEL1
COL6A3
HES6
PER2
HDAC4
NDUFA10
PASK
HDLBP
PDCD1
SNTG2
TPO
RPS7
COLEC11
ALLC
LPIN1
MYCN
RHOB
NCOA1
HADHB
DRC1
GCKR
SPAST
LTBP1
CRIM1
NDUFAF7
ABCG8
PPM1B
SLC3A1
SIX3
EPAS1
TTC7A
EPCAM
MSH2
MSH6
FOXN2
PEX13
COMMD1
B3GNT2
MDH1
CEP68
MEIS1
PROKR1
ANTXR1
ATP6V1B1
DYSF
SPR
ALMS1
STAMBP
DGUOK
HTRA2
DOK1
HK2
MRPL19
REG1A
TCF7L1
RPIA
ARID5A
CNNM4
COX5B
ZAP70
CNGA3
INPP4A
LIPT1
NPAS2
IL1R1
IL1RL1
IL18R1
IL18RAP
MRPS9
NCK2
SLC5A7
SULT1C2
SULT1C4
BCL2L11
MERTK
IL36RN
IL1RN
DPP10
INSIG2
STEAP3
DBI
GLI2
CNTNAP5
GYPC
PROC
MYO7B
PTPN18
CCNT2
RAB3GAP1
HNMT
MBD5
EPC2
GPD2
SLC4A10
SCN2A
CERS6
G6PC2
DHRS9
BBS5
RP11-724O16.1
PPIG
UBR3
GAD1
DCAF17
CYBRD1
ITGA6
PDK1
HOXD13
HOXD10
HOXD4
AGPS
DFNB59
ITGA4
ZNF804A
COL3A1
PMS1
GLS
MARS2
AOX1
NDUFB3
CFLAR
CASP10
CASP8
BMPR2
CTLA4
ICOS
PARD3B
NRP2
EEF1B2
FASTKD2
CPO
CREB1
PIKFYVE
MAP2
UNC80
CPS1
SPAG16
ATIC
XRCC5
SMARCAL1
GPBAR1
PNKD
SLC11A1
BCS1L
CYP27A1
WNT10A
DNAJB2
DES
GMPPA
INHA
SLC4A3
MRPL44
COL4A3
MFF
SP100
DIS3L2
PRSS56
CHRND
CHRNG
GIGYF2
NEU2
ATG16L1
SAG
DGKD
UGT1A8
UGT1A10
UGT1A9
UGT1A7
UGT1A6
UGT1A5
UGT1A4
UGT1A3
UGT1A1
MLPH
TRAF3IP1
TWIST2
CAPN10
AGXT
ANO7
D2HGDH
CRBN
SUMF1
OXTR
SRGAP3
CIDEC
GHRL
ATP2B2
RAF1
WNT7A
XPC
MRPS25
COLQ
DAZL
THRB
SLC4A7
EOMES
GLB1
PLCD1
SCN5A
SCN10A
SCN11A
CX3CR1
CCK
CYP8B1
POMGNT2
ANO10
SLC6A20
LZTFL1
FYCO1
XCR1
CCR1
LTF
ALS2CL
MYL3
SETD2
SCAP
COL7A1
UQCRC1
SLC26A6
SLC25A20
IMPDH2
LAMB2
GPX1
AMT
GMPPB
MST1R
HYAL1
RASSF1
ZMYND10
CISH
POC1A
TLR9
TLR9
BAP1
TNNC1
NEK4
ITIH4
RFT1
RP11-894J14.5
TKT
CHDH
WNT5A
IL17RD
HESX1
ARF4
DNASE1L3
PDHB
FEZF2
PRICKLE2
MAGI1
SUCLG2
UBA3
FOXP1
PROK2
ROBO1
GBE1
POU1F1
CPOX
ABI3BP
IMPG2
CBLB
MYH15
BTLA
DRD3
ZNF80
TMEM39A
GSK3B
HGD
POLQ
HCLS1
IQCB1
ILDR1
ADCY5
MYLK
CCDC14
MUC13
UROC1
MGLL
RUVBL1
GATA2
CNBP
MBD4
PLXND1
PIK3R4
MRPL3
NPHP3
TOPBP1
SLCO2A1
RYK
STAG1
A4GNT
PIK3CB
FOXL2
ATR
SLC9A9
PLOD2
ZIC4
CP
WWTR1
CLRN1
RP11-166N6.3
P2RY12
DHX36
SLC33A1
RP11-432B6.3
IFT80
B3GALNT1
SI
BCHE
SERPINI2
PDCD10
SLC2A2
GHSR
TNFSF10
SPATA16
TBL1XR1
GNB4
MRPL47
CCDC39
DNAJC19
MCCC1
MCF2L2
PARL
ABCC5
ALG3
CLCN2
THPO
EHHADH
LIPH
CRYGS
MASP1
SST
BCL6
LEPREL1
CLDN1
ATP13A4
APOD
TFRC
PCYT1A
TM4SF19
TM4SF19
RNF168
MFI2
DLG1
CHL1
CNTN6
CNTN4
TRNT1
ITPR1
GRM7
CAV3
SETD5
MTMR14
OGG1
CRELD1
FANCD2
VHL
SLC6A11
SLC6A1
ATG7
PPARG
TSEN2
TMEM43
RP11-434D12.1
SLC6A6
BTD
RARB
TGFBR2
GPD1L
CRTAP
PDCD6IP
MLH1
ITGA9
DLEC1
MYD88
SLC22A14
ACVR2B
SLC25A38
CTNNB1
SNRK
ABHD5
ZNF35
LARS2
CCR3
CCR2
CCR5
CCRL2
TDGF1
TMIE
PTH1R
NBEAL2
CAMP
TREX1
NDUFAF3
DAG1
GNAT1
GNAI2
DOCK3
ABHD14A-ACY1
ACY1
GLYCTK
ITIH1
ITIH3
PRKCD
CACNA1D
IL17RB
CACNA2D3
FLNB
ATXN7
SLC25A26
ARL6IP5
MITF
ROBO2
CHMP2B
EPHA3
ARL13B
ARL6
TBC1D23
TFG
TRMT10C
ALCAM
PVRL3
CD96
GAP43
ARHGAP31
NR1I2
NDUFB4
GTF2E1
SLC15A2
CD86
CASR
CSTA
DIRC2
UMPS
CHST13
RAB7A
ACAD9
GP9
IFT122
RHO
TRH
COL6A5
ATP2C1
BFSP2
TF
CEP63
PCCB
SLC35G2
IL20RB
MRPS22
CLSTN2
TRPC1
CHST2
ZIC1
AGTR1
GYG1
HPS3
AADACL2
AADAC
MBNL1
MME
GMPS
RSRC1
MLF1
GFM1
IL12A
SERPINI1
NLGN1
PIK3CA
SOX2
HTR3C
HTR3E
EIF2B5
EIF4G1
MAP3K13
AHSG
HRG
ADIPOQ
LPP
TP63
CLDN16
CCDC50
OPA1
ATP5I
GAK
SLC26A1
RNF212
SLBP
LETM1
NELFA
LRPAP1
EVC2
PPP2R2C
HMX1
SLC2A9
WDR1
CLNK
RAB28
NKX3-2
FGFBP1
PROM1
QDPR
GPR125
PPARGC1A
SEPSECS
CCKAR
TLR10
TLR1
TLR6
PHOX2B
GABRG1
GABRA2
COX7B2
GABRA4
CORIN
CNGA1
SGCB
USP46
CLOCK
NMU
PPAT
IGFBP7
EPHA5
GNRHR
TMPRSS11A
UGT2B4
UGT2A2
UGT2A1
UGT2A1
SULT1B1
SULT1E1
GC
CXCL5
BTC
CXCL10
CXCL11
SCARB2
GK2
ANTXR2
HNRNPD
HNRNPDL
COQ2
HELQ
FAM175A
WDFY3
MAPK10
HSD17B11
ABCG2
SNCA
UNC5C
EIF4E
ADH5
ADH4
ADH6
ADH1A
ADH1C
ADH7
MANBA
TACR3
DKK2
LEF1
ETNPPL
COL25A1
CFI
PITX2
PRSS12
FABP2
MAD2L1
PRDM5
ANXA5
CCNA2
BBS7
TRPC3
IL2
IL21
NUDT6
MFSD8
PABPC4L
PCDH18
NDUFC1
UCP1
FREM3
PRMT10
NR3C2
LRBA
FBXW7
DCHS2
FGA
FGG
PDGFC
NPY1R
NEK1
HAND2
HPGD
AGA
DCTD
IRF2
CASP3
PDLIM3
MTNR1A
PDE6B
IDUA
FGFRL1
UVSSA
FGFR3
WHSC1
NAT8L
SH3BP2
ADD1
GRK4
HTT
DOK7
ADRA2C
MSX1
EVC
WFS1
CPZ
CC2D2A
BST1
CD38
GBA3
SOD3
SLC34A2
RBPJ
STIM2
DTHD1
TBC1D1
WDR19
LIAS
CHRNA9
NSUN7
UCHL1
GRXCR1
GABRB1
ATP10D
FIP1L1
PDGFRA
SRD5A3
TMEM165
CEP135
SRP72
HTN3
MUC7
ENAM
DCK
SLC4A4
NPFFR2
ALB
AFP
IL8
C4orf26
SHROOM3
MRPL1
FRAS1
BMP2K
MRPS18C
CDS1
ARHGAP24
PTPN13
AFF1
DSPP
DMP1
IBSP
SPP1
PKD2
GRID2
SMARCAD1
PDLIM5
BMPR1B
MTTP
BANK1
NFKB1
TET2
AIMP1
CYP2U1
HADH
GAR1
RRH
LRIT3
EGF
LARP7
ANK2
UGT8
MYOZ2
BBS12
FGF2
FAT4
SLC25A31
MGST2
HHIP
SMAD1
MMAA
EDNRA
TRIM2
TLR2
FGB
LRAT
NPY2R
TDO2
GLRB
ETFDH
MSMO1
CPE
TLL1
PALLD
TENM3
TRAPPC11
SLC25A4
TLR3
CYP4V2
F11
TERT
SLC6A3
MRPL36
IRX4
NSUN2
CTNND2
DNAH5
ANKH
FAM134B
CDH12
DROSHA
SLC45A2
AMACR
RAD1
AGXT2
PRLR
C5orf42
NUP155
GDNF
LIFR
C9
DAB2
C6
OXCT1
SEPP1
FGF10
HCN1
MOCS2
CCNO
PDE4D
ERCC8
HTR1A
MRPS27
COL4A3BP
AP3B1
ARSB
DMGDH
HOMER1
DHFR
MEF2C
TTC37
PCSK1
ERAP1
SLCO4C1
SLCO6A1
LOX
CEP120
ALDH7A1
FBN2
HINT1
FNIP1
IRF1
IL5
GDF9
CDKL3
SAR1B
PITX1
IL9
TRPC7
HNRNPA0
HSPA9
SIL1
SLC23A1
TMEM173
HBEGF
SRA1
APBB3
CD14
NDUFA2
HARS
SLC25A2
DIAPH1
SPRY4
FGF1
NR3C1
LARS
PPP2R2B
SPINK1
SH3TC2
PDE6A
CSF1R
PDGFRB
RPS14
SLC36A2
GLRA1
HAND1
HAVCR1
ADAM19
IL12B
GABRB2
SLIT3
FBXW11
STK10
SH3PXD2B
NKX2-5
DRD1
SNCB
UIMC1
F12
PROP1
NHP2
PHYKPL
GRM6
ADAMTS2
HNRNPH1
GFPT2
FLT4
MGAT1
AHRR
SLC6A19
SLC6A18
NDUFS6
ADAMTS16
PAPD7
MTRR
CCT5
ROPN1L
TRIO
NPR3
SPEF2
IL7R
SLC1A3
NIPBL
OSMR
PTGER4
C7
GHR
NNT
MRPS30
ISL1
ITGA2
NDUFS4
HSPB3
IL31RA
MAP3K1
NDUFAF2
SREK1
MAST4
PIK3R1
SLC30A5
MRPS36
CDK7
MARVELD2
OCLN
BDP1
MCCC2
CARTPT
TNPO1
ARHGEF28
HEXB
HMGCR
IQGAP2
F2R
F2RL1
AGGF1
PDE8B
BHMT
THBS4
MSH3
XRCC4
VCAN
COX7C
RASA1
GPR98
NR2F1
CAST
ERAP2
SLC25A46
TSLP
WDR36
CAMK4
APC
CTC-554D6.1
DMXL1
HSD17B4
SNCAIP
LMNB1
MEGF10
IL3
CSF2
SLC22A4
SLC22A5
RAD50
IL13
IL4
UQCRQ
TCF7
UBE2B
CATSPER3
TGFBI
MYOT
REEP2
MATR3
HARS2
PCDHA10
PCDHA13
PCDHB4
ARHGAP26
POU4F3
STK32A
SCGB3A2
SPINK5
FBXO38
ADRB2
PPARGC1B
SLC26A2
TCOF1
NDST1
SYNPO
IRGM
GPX3
GM2A
GRIA1
MRPL22
SGCD
ITK
NIPAL4
FABP6
GABRA6
GABRA1
GABRG2
WWC1
RARS
FOXI1
GABRP
NPM1
MSX2
HRH2
CPLX2
HIGD2A
TSPAN17
FGFR4
NSD1
SLC34A1
B4GALT7
LTC4S
SQSTM1
HUS1B
SERPINB6
LYRM4
F13A1
TFAP2A
MAK
GCM2
NEDD9
ADTRP
DTNBP1
ATXN1
NHLRC1
TPMT
PRL
DCDC2
SLC17A1
SLC17A3
HIST1H4B
GPX6
UBD
GABBR1
ZFP57
DHX16
C6orf15
CDSN
CCHCR1
DDX39B
NCR3
BAG6
GPANK1
DDAH2
HSPA1L
NEU1
EHMT2
DXO
TNXB
FKBPL
AGER
NOTCH4
BTNL2
HLA-DRB5
HLA-DRB1
HLA-DQB1
TAP2
TAP2
PSMB8
TAP1
HLA-DMB
XXbac-BPG181M17.5
HLA-DOA
HLA-DPA1
COL11A2
TAPBP
RPS10
TULP1
FKBP5
CLPS
BTBD9
GLO1
MOCS1
UNC5CL
TREM2
PGC
GUCA1B
MRPS10
TRERF1
PRPH2
PEX6
CUL7
MRPL2
MRPS18A
MRPL14
TCTE1
AARS2
CYP39A1
PLA2G7
MUT
RHAG
CRISP2
PKHD1
IL17F
GSTA3
GSTA4
ICK
GCLC
BMP5
DST
RAB23
EYS
LMBRD1
COL9A1
SLC17A5
COL12A1
COX7A2
IMPG1
HTR1B
PHIP
LCA5
ELOVL4
RP11-321N4.5
SYNCRIP
CGA
RARS2
CNR1
GABRR1
GABRR2
MDN1
EPHA7
NDUFAF4
FBXL4
SIM1
ASCC3
HACE1
PDSS2
SEC63
OSTM1
SNX3
ZBTB24
DDO
SLC22A16
CDK19
REV3L
TRAF3IP2
LAMA4
FRK
COL10A1
TSPYL1
ROS1
GOPC
CEP85L
TRDN
SOGA3
SOGA3
PTPRK
MED23
CTGF
VNN1
SGK1
ALDH8A1
HBS1L
AHI1
IL20RA
IFNGR1
CITED2
HIVEP2
FUCA2
PLAGL1
EPM2A
RMND1
SYNE1
TFB1M
SERAC1
SOD2
TCP1
SLC22A2
PARK2
PDE10A
T
MPC1
RNASET2
RP11-514O12.4
THBS2
TCTE3
DLL1
IRF4
FOXF2
FOXC1
NQO2
FARS2
DSP
GCNT2
EDN1
PHACTR1
SIRT5
MYLIP
FAM8A1
ALDH5A1
HFE
HIST1H2AE
BTN2A1
BTN1A1
PGBD1
GPX5
MOG
HLA-G
HLA-E
MRPS18B
DDR1
VARS2
MICA
MICB
NFKBIL1
LTA
TNF
AIF1
PRRC2A
APOM
MSH5
MSH5-SAPCD1
C2
CFB
CFB
SKIV2L
STK19
HLA-DRA
HLA-DQA1
PSMB9
HLA-DPB1
SYNGAP1
ITPR3
UHRF1BP1
ANKS1A
PPARD
FANCE
LHFPL5
PNPLA1
CDKN1A
DNAH8
GLP1R
APOBEC2
GUCA1A
CNPY3
GNMT
PPP2R5D
PTK7
SLC22A7
ABCC10
POLR1C
POLH
RSPH9
VEGFA
SLC29A1
RUNX2
SLC25A27
CD2AP
TFAP2B
IL17A
EFHC1
TINAG
HCRTR2
PHF3
RIMS1
MTO1
CD109
MYO6
BCKDHB
TPBG
NT5E
SLC35A1
GRIK2
LIN28B
SOBP
NR2E1
FIG4
WISP3
AL121963.1
DSE
RSPH4A
RFX6
PLN
FABP7
NKAIN2
LAMA2
ARG1
ENPP1
TAAR9
TAAR6
RPS12
EYA4
TCF21
MYB
PDE7B
PEX7
TNFAIP3
PEX3
STX11
UTRN
GRM1
STXBP5
TAB2
PCMT1
IYD
MTHFD1L
CCDC170
ESR1
VIP
OPRM1
ARID1B
GTF2H5
SYTL3
ACAT2
MRPL18
IGF2R
SLC22A1
SLC22A3
PLG
PACRG
QKI
CCR6
UNC93A
SMOC2
TBP
MAD1L1
BRAT1
CARD11
ACTB
RNF216
NDUFA4
THSD7A
ETV1
AGMO
ISPD
TWIST1
SP8
FAM126A
DFNA5
CYCS
HNRNPA2B1
HOXA1
HOXA2
HOXA4
HOXA10
HOXA11
HOXA13
FKBP14
NOD1
NT5C3A
RP9
AOAH
MPLKIP
GLI3
MRPS24
PGAM2
GCK
NPC1L1
MYO1G
IGFBP3
TNS3
PKD1L1
ZPBP
DDC
GRB10
PSPH
PHKG1
GUSB
MLXIPL
STX1A
RFC2
HIP1
CCL26
MAGI2
HGF
CACNA2D1
SEMA3E
SEMA3A
ABCB4
ABCB1
SLC25A40
SRI
STEAP4
CYP51A1
PEX1
SAMD9
CALCR
SGCE
PON1
PON3
PON2
PDK4
SLC25A13
SHFM1
DLX5
ASNS
PTCD1
ATP5J2-PTCD1
CYP3A5
CYP3A7
CYP3A4
GJC3
TFR2
ACHE
PLOD3
SLC26A5
RELN
NAMPT
[truncated: 3,188 more rows]
